# Supplementary material
Source: MDPI journal article supplement (https://www.mdpi.com/2073-4441/10/8/1068)
Supplement: s1 [file s1]

# Modeling Approach For Water-Quality Management to Control Pollution Concentration: A Case Study with Ravi River, Punjab, Pakistan

Supplementary Materials

**Table S1.** Water-quality measurement collected along the Ravi River (1<sup>st</sup> Survey).

| Site/Parameters               |     | TDS<br>(mg L <sup>-1</sup> ) | NH <sub>3</sub> -N<br>(mg L <sup>-1</sup> ) | NO <sub>3</sub> -N<br>(mg L <sup>-1</sup> ) | BOD<br>(mg L <sup>-1</sup> ) | DO<br>(mg L <sup>-1</sup> ) | Temp. | pH    |
|-------------------------------|-----|------------------------------|---------------------------------------------|---------------------------------------------|------------------------------|-----------------------------|-------|-------|
| Mehmood Booti Drain           | D1  | 1598                         | 56.32                                       | 192.64                                      | 709.6                        | 0.8                         | 26.03 | 7.51  |
| Sukh Naher Drain              | D2  | 1488                         | 6.18                                        | 21.21                                       | 78.0                         | 0.4                         | 26.05 | 7.21  |
| Shadbag Drain                 | D3  | 2092                         | 9.10                                        | 31.35                                       | 115.1                        | 0.8                         | 24.04 | 7.10  |
| Shahdara Town Pumping Station | D4  | 1177                         | 6.04                                        | 20.88                                       | 76.5                         | 1.1                         | 22.85 | 7.48  |
| Forest Colony Pumping Station | D5  | 902                          | 10.77                                       | 37.32                                       | 136.6                        | 0.9                         | 25.57 | 7.24  |
| Farukhabad Drain              | D6  | 20965                        | 17.71                                       | 61.60                                       | 225.2                        | 0.4                         | 23.86 | 7.27  |
| Budha Ravi Drain              | D7  | 1488                         | 4.73                                        | 16.50                                       | 60.2                         | 0.9                         | 24.11 | 7.17  |
| Main Outfall Drain            | D8  | 1194                         | 20.38                                       | 71.35                                       | 260.0                        | 0.9                         | 24.05 | 7.06  |
| Gulshan-E-Ravi Drain          | D9  | 1381                         | 5.51                                        | 19.37                                       | 70.5                         | 0.7                         | 23.36 | 7.43  |
| Babu Sabu Drain               | D10 | 1360                         | 21.28                                       | 75.00                                       | 272.5                        | 0.4                         | 22.47 | 7.33  |
| Hudiara Drain                 | D11 | 6033                         | 7.28                                        | 25.75                                       | 93.4                         | 0.9                         | 22.01 | 7.71  |
| Jaranwala Drain/Deg II        | D12 | 6359                         | 18.38                                       | 65.82                                       | 237.4                        | 0.5                         | 22.98 | 7.42  |
| Samundari Drain               | D13 | 5004                         | 3.64                                        | 13.07                                       | 47.1                         | 0.6                         | 25.65 | 8.09  |
| Sukhwara Drain                | D14 | 2212                         | 2.6364                                      | 10.873                                      | 16.761                       | 1.164                       | 20.56 | 7.566 |
| Miral Ravi Link Canal         | C1  | 537                          | 0.42                                        | 1.42                                        | 2.6                          | 6.1                         | 22.98 | 7.9   |
| U.C. Canal                    | C2  | 481                          | 0.30                                        | 1.06                                        | 3.9                          | 5.01                        | 23.09 | 7.65  |
| Q.B. Link Canal               | C3  | 397                          | 0.14                                        | 2.52                                        | 2.9                          | 6.3                         | 22.79 | 7.56  |
| Miroo Wal                     | M1  | 628                          | 0.77                                        | 2.65                                        | 2.96                         | 6.52                        | 22.15 | 7.74  |
| Railway Bridge                | M2  | 700                          | 2.31                                        | 12.13                                       | 12.31                        | 3.8                         | 21.59 | 7.72  |
| Sughyan Bridge                | M3  | 790                          | 2.1                                         | 14.12                                       | 16.29                        | 3.16                        | 21.12 | 7.81  |
| Darbar Bridge                 | M4  | 1400                         | 5.8                                         | 20.91                                       | 40.1                         | 2.5                         | 21.61 | 7.76  |
| Karianwala                    | M5  | 1000                         | 1.82                                        | 9.3                                         | 17.97                        | 3.85                        | 21.28 | 7.75  |
| Moza Malayka                  | M6  | 1030                         | 2.6                                         | 10.5                                        | 14.06                        | 3.8                         | 21.66 | 7.71  |

**Table S2.** Water-quality measurement collected along the Ravi River (2<sup>nd</sup> Survey).

| Site/Parameters               |     | TDS<br>(mg L <sup>-1</sup> ) | NH <sub>3</sub> -N<br>(mg L <sup>-1</sup> ) | NO <sub>3</sub> -N<br>(mg L <sup>-1</sup> ) | BOD<br>(mg L <sup>-1</sup> ) | DO<br>(mg L <sup>-1</sup> ) | Temp. | pH   |
|-------------------------------|-----|------------------------------|---------------------------------------------|---------------------------------------------|------------------------------|-----------------------------|-------|------|
| Mehmood Booti Drain           | D1  | 1917                         | 56.32                                       | 192.64                                      | 731                          | 0.21                        | 26.31 | 8.24 |
| Sukh Naher Drain              | D2  | 1563                         | 6.18                                        | 21.21                                       | 80.3                         | 0.32                        | 25.60 | 7.41 |
| Shadbag Drain                 | D3  | 1435                         | 9.10                                        | 31.35                                       | 118.34                       | 0.23                        | 23.86 | 7.36 |
| Shahdara Town Pumping Station | D4  | 1448                         | 6.04                                        | 20.88                                       | 78.59                        | 0.97                        | 24.91 | 7.61 |
| Forest Colony Pumping Station | D5  | 1187                         | 10.77                                       | 37.32                                       | 140.1                        | 0.87                        | 24.83 | 7.34 |
| Farukhabad Drain              | D6  | 19781                        | 17.71                                       | 61.60                                       | 230.6                        | 0.43                        | 23.26 | 7.47 |
| Budha Ravi Drain              | D7  | 1951                         | 4.73                                        | 16.50                                       | 61.6                         | 0.82                        | 24.16 | 7.37 |
| Main Outfall Drain            | D8  | 1547                         | 20.38                                       | 71.35                                       | 265.6                        | 1.1                         | 24.14 | 7.26 |
| Gulshan-E-Ravi Drain          | D9  | 1687                         | 5.51                                        | 19.37                                       | 71.9                         | 0.69                        | 23.63 | 7.53 |
| Babu Sabu Drain               | D10 | 1794                         | 21.28                                       | 75.00                                       | 260.8                        | 0.41                        | 22.51 | 7.56 |
| Hudiara Drain                 | D11 | 4719                         | 7.28                                        | 25.75                                       | 88.8                         | 0.89                        | 22.13 | 7.95 |
| Jaranwala Drain/Deg II        | D12 | 4624                         | 18.38                                       | 65.82                                       | 237.4                        | 0.61                        | 23.06 | 7.96 |
| Samundari Drain               | D13 | 5721                         | 3.64                                        | 13.07                                       | 47.1                         | 0.67                        | 25.72 | 7.68 |
| Sukhwara Drain                | D14 | 3212                         | 2.6364                                      | 10.873                                      | 16.761                       | 0.98                        | 21.81 | 7.85 |
| Miral Ravi Link Canal         | C1  | 655                          | 0.42                                        | 1.42                                        | 2.6                          | 6.01                        | 22.98 | 7.9  |
| U.C. Canal                    | C2  | 509                          | 0.30                                        | 1.06                                        | 3.51                         | 4.98                        | 23.09 | 7.71 |
| Q.B. Link Canal               | C3  | 411                          | 0.14                                        | 2.52                                        | 1.95                         | 5.89                        | 22.79 | 7.67 |
| Miroo Wal                     | M1  | 648                          | 0.71                                        | 2.65                                        | 2.96                         | 6.48                        | 22.15 | 7.74 |
| Railway Bridge                | M2  | 714                          | 2.36                                        | 12.13                                       | 12.31                        | 3.62                        | 21.59 | 7.78 |
| Sughyan Bridge                | M3  | 806                          | 2.07                                        | 14.12                                       | 16.29                        | 3.14                        | 21.12 | 7.91 |
| Darbar Bridge                 | M4  | 1398                         | 6.01                                        | 20.91                                       | 40.1                         | 2.42                        | 21.87 | 7.86 |
| Karianwala                    | M5  | 987                          | 1.81                                        | 9.3                                         | 17.97                        | 3.72                        | 21.56 | 7.91 |
| Moza Malayka                  | M6  | 1077                         | 2.32                                        | 10.5                                        | 14.06                        | 3.83                        | 21.92 | 7.85 |

**Table S3.** Water-quality measurement collected along the Ravi River (3<sup>rd</sup> Survey).

| Site/Parameters               |     | TDS<br>(mg L <sup>-1</sup> ) | NH <sub>3</sub> -N<br>(mg L <sup>-1</sup> ) | NO <sub>3</sub> -N<br>(mg L <sup>-1</sup> ) | BOD<br>(mg L <sup>-1</sup> ) | DO<br>(mg L <sup>-1</sup> ) | Temp. | pH   |
|-------------------------------|-----|------------------------------|---------------------------------------------|---------------------------------------------|------------------------------|-----------------------------|-------|------|
| Mehmood Booti Drain           | D1  | 1921                         | 54.97                                       | 210.30                                      | 721.0                        | 0.26                        | 23.23 | 7.75 |
| Sukh Naher Drain              | D2  | 1563                         | 6.14                                        | 78.2                                        | 80.23                        | 0.51                        | 22.15 | 8.06 |
| Shadbag Drain                 | D3  | 1310                         | 9.23                                        | 34.4                                        | 118.44                       | 0.43                        | 23.04 | 8.07 |
| Shahdara Town Pumping Station | D4  | 1413                         | 6.07                                        | 37.1                                        | 74.39                        | 0.57                        | 24.85 | 7.61 |
| Forest Colony Pumping Station | D5  | 1085                         | 10.81                                       | 20.88                                       | 139.13                       | 0.46                        | 24.57 | 7.63 |
| Farukhabad Drain              | D6  | 21634                        | 17.13                                       | 58.92                                       | 231.59                       | 0.42                        | 23.86 | 7.17 |
| Budha Ravi Drain              | D7  | 1781                         | 4.98                                        | 66.12                                       | 61.78                        | 0.82                        | 22.11 | 7.17 |
| Main Outfall Drain            | D8  | 1421                         | 20.78                                       | 84.53                                       | 259.0                        | 0.79                        | 23.05 | 7.56 |
| Gulshan-E-Ravi Drain          | D9  | 1381                         | 5.64                                        | 20.60                                       | 67.31                        | 0.32                        | 22.36 | 7.41 |
| Babu Sabu Drain               | D10 | 1857                         | 21.98                                       | 42.13                                       | 258.3                        | 0.74                        | 23.47 | 7.24 |
| Hudiara Drain                 | D11 | 4721                         | 8.31                                        | 31.78                                       | 96.4                         | 0.88                        | 22.01 | 7.78 |
| Jaranwala Drain/Deg II        | D12 | 4031                         | 14.89                                       | 71.34                                       | 224.3                        | 0.53                        | 23.01 | 7.65 |
| Samundari Drain               | D13 | 5765                         | 5.03                                        | 19.25                                       | 44.23                        | 0.56                        | 24.76 | 7.89 |
| Sukhwara Drain                | D14 | 2874                         | 3.21                                        | 16.14                                       | 19.16                        | 0.78                        | 21.04 | 7.66 |
| Miral Ravi Link Canal         | C1  | 594                          | 0.67                                        | 2.18                                        | 3.12                         | 6.21                        | 22.41 | 7.81 |
| U.C. Canal                    | C2  | 610                          | 0.61                                        | 1.34                                        | 3.11                         | 4.47                        | 23.49 | 7.56 |
| Q.B. Link Canal               | C3  | 597                          | 0.32                                        | 2.14                                        | 2.24                         | 5.78                        | 23.26 | 7.58 |
| Miroo Wal                     | M1  | 680                          | 0.7                                         | 3.6                                         | 2.81                         | 6.03                        | 22.13 | 7.64 |
| Railway Bridge                | M2  | 651                          | 1.7                                         | 11.76                                       | 12.33                        | 3.81                        | 21.83 | 7.27 |
| Sughyan Bridge                | M3  | 840                          | 2.1                                         | 14.23                                       | 16.28                        | 2.87                        | 22.22 | 7.81 |
| Darbar Bridge                 | M4  | 1222                         | 5.07                                        | 21.07                                       | 37.04                        | 2.41                        | 21.27 | 7.83 |
| Karianwala                    | M5  | 937                          | 1.83                                        | 7.84                                        | 15.41                        | 3.53                        | 21.06 | 7.86 |
| Moza Malayka                  | M6  | 861                          | 1.84                                        | 6.33                                        | 14.16                        | 4.12                        | 21.98 | 7.81 |
